# Supplementary material
Source: PubMed Central journal article supplement (PMC3406146)
Supplement: AEM.00949-12_zam999103525so1.pdf [file AEM.00949-12_zam999103525so1.pdf]

## Content:

1. Two-liquid phase biotransformation of DAME using *P. fluorescens* as host
2. Homology analysis of AlkL, OmpW, and OprG with BlastP

### 1. *Pseudomonas* as alternative host:

DAME oxygenation activity of different *Pseudomonas* strains was investigated in resting cell assays. The best performing strain *P. fluorescens* CHA0 (pBT10) was further investigated in the two-liquid phase setup as described in the original article. Fig. S1 shows product formation (A) and specific activities (B) achieved in this setup.

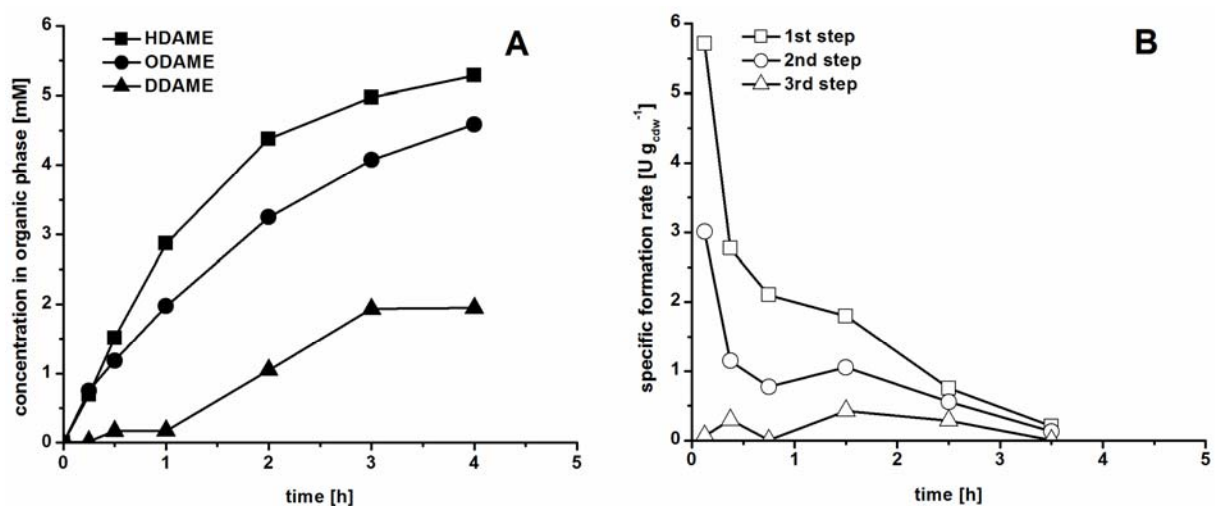

**Figure S1.** Two-liquid phase biotransformation of DAME using  $8.5 \text{ g}_{\text{cdw}} \text{ L}^{-1}$  resting cells of *P. fluorescens* CHA0 (pBT10) fed with citrate. The substrate was applied as organic phase at a phase ratio of 1:3 (organic phase : total volume). Product concentrations in the organic phase (A) and specific activities for the different oxygenation steps (B) are given. Specific activities are calculated based on product formation.

## 2. Homology analysis of AlkL, OmpW, and OprG

The alignment of AlkL from *P. putida* GPo1, OmpW from *E. coli*, and OprG from *P. aeruginosa* was performed using BlastP (Tables S1 and S2). For visualisation of the homology, the three amino acid sequences were aligned using Clustal W2 (Fig. S3).

a) AlkL vs OmpW:

**Table S1.** Results of BlastP-analysis for alignment of AlkL from *P. putida* GPo1 and OmpW from *E. coli*

| Max score | Total score | Query coverage | E value | Max ident |
|-----------|-------------|----------------|---------|-----------|
| 82        | 82          | 68%            | 2e-23   | 29%       |

B) AlkL vs OprG:

**Table S2.** Results of BlastP-analysis for alignment of AlkL from *P. putida* GPo1 and OprG from *P. aeruginosa*

| Max score | Total score | Query coverage | E value | Max ident |
|-----------|-------------|----------------|---------|-----------|
| 59.7      | 59.7        | 86%            | 1e-15   | 23%       |

|      |                                                               |     |
|------|---------------------------------------------------------------|-----|
| OmpW | MKK--LTVAALAVTT-----LLSGSAFAHEAGEFFMRAGSATVRPTEGAG-           | 43  |
| OprG | MRKSWLTASLLALTVA-----SPFAAADIQGHKAGDFIIRGGFATVDPDDSSSD        | 49  |
| AlkL | MSFSNYKVIAMPVLVANFVLGAATAWANENYPAKSAGYNQGDWVASFNFSKVVYVGEELGD | 60  |
|      | * .. ::: . ... ::: *:: . . : *                                |     |
| OmpW | ----GTLGSLGGFSVTNNTQLGLTFTYMATDNIGVELLAATPFRHKIGTRATG----DI   | 94  |
| OprG | IKLDGAKQRGKATVDSDTQLGLTFTYMFADKKGVELVAATPFMHQVDVKGLGPGLDGKL   | 109 |
| AlkL | LNVGGLPMDVSIQNDTTLTFDIAYFVSSNIAVDFFVGVPARAKFQGEKSISSLG-RV     | 119 |
|      | * :: : * * : : * : : : * : : : * : : : * . . . :              |     |
| OmpW | ATVHHLPTLMAQWY-FGDASSKFRPYVGAGINYTTFFDNGFNDHGKEAGLSDLKDSW     | 153 |
| OprG | ADIKQLPPTLLQYYPMGGTNSAFQPYGGLGVNYTTFFDEDLASNRKAQGFSSMKLQDSW   | 169 |
| AlkL | SEVDYGPAILSLQYH--YDSFERLYPYVGVGVGRVLFDDK-----TDGALSSFIDIKDW   | 171 |
|      | : : . * . * * : : . : . : * * * * : . * : : * : : * . *       |     |
| OmpW | GAAGQVGVVDYLINRDWLVNMSVWYMDIDTTANYK----LGGAQQHDSVRLDPWVFMFSAG | 209 |
| OprG | GLAGELGFDYMLNEHALFNMAVWYMDIDTKASINGPSALGVNKTQVDVDPWVYMIGFG    | 229 |
| AlkL | APAFQVGLRYDLGNSWMLNSDVRYIPFKTDVTGT----LGPVVPVSTKIEVDPFILSLGAS | 227 |
|      | . * : : * . * : : . : * * * : : * . . . ** . : : * : : . . .  |     |
| OmpW | YRF 212                                                       |     |
| OprG | YKF 232                                                       |     |
| AlkL | YVF 230                                                       |     |
|      | * *                                                           |     |

**Figure S2.** Alignment of AlkL from *P. putida* GPo1, OmpW from *E. coli*, and OprG from *P. aeruginosa* (Clustal W2; <http://www.ebi.ac.uk/Tools/msa/clustalw2/>)
